# Supplementary material
Source: bioRxiv or medRxiv preprint supplement (https://www.biorxiv.org/highwire/filestream/68962/field_highwire_adjunct_files/0/226175-1.pdf)
Supplement: Supplementary file [file 226175-1.pdf]

## Supplementary methods

| Species                | Food         |
|------------------------|--------------|
| <i>D.americana</i>     | malt         |
| <i>D.arizonae</i>      | banana       |
| <i>D.euronotus</i>     | cornmeal     |
| <i>D.lummei</i>        | malt + yeast |
| <i>D.mauritiana</i>    | propionic    |
| <i>D.melanogaster</i>  | cornmeal     |
| <i>D.mojavensis</i>    | banana       |
| <i>D.montana</i>       | malt + yeast |
| <i>D.paramelanica</i>  | cornmeal     |
| <i>D.persimilis</i>    | malt         |
| <i>D.prosaltans</i>    | propionic    |
| <i>D.pseudoobscura</i> | banana       |
| <i>S.lebanonensis</i>  | propionic    |
| <i>S.pattersoni</i>    | Banana       |
| <i>D.santomea</i>      | cornmeal     |
| <i>D.sechellia</i>     | propionic    |
| <i>D.simulans</i>      | cornmeal     |
| <i>D.teissieri</i>     | cornmeal     |

**Table S1: Fly species and food reared on.** Food recipes can be found in [1, 2]

| Primer pair code | Primer   | Sequence                       | Annealing temperature °C |
|------------------|----------|--------------------------------|--------------------------|
| A                | DCV62F   | GCCTGCGGTCCTAATTGTTGAAT        | 69                       |
|                  | DCV1245R | CATTCATCTGTTCCAGAGCCAACACCAT   |                          |
| B                | DCV1131F | GAGTTGCGTCGACAAATCAAAAATAGGAA  | 69                       |
|                  | DCV2330R | CTGAGGAAAAGTGTGCAAGAGCGAAT     |                          |
| C                | DCV2243F | TGATGATGCGTTTCAGAAGAAAGACGA    | 69                       |
|                  | DCV3406R | GTAGACCACTGGGCAAGTTCACGTTTC    |                          |
| D                | DCV3290F | CGAATGTGGTATGCATAGGATGTCTGC    | 69                       |
|                  | DCV4468R | ACTGCCTGTCCCACACGAATAGATGAC    |                          |
| E                | DCV4377F | CCCAATATGGTTGATCCACTTGGTGAT    | 69                       |
|                  | DCV5495R | AAATTTCTCCATCACACGAATCCACGA    |                          |
| F                | DCV5405F | ACCTCCGGCAACCCTTCACTGTTAT      | 69                       |
|                  | DCV6553R | GACTAAAGTTGCTCGCAAACCCACAAA    |                          |
| G                | DCV6423F | CTGGTCTTTGGTCTTCCGCTACAACCTG   | 69                       |
|                  | DCV7693R | GCGAGAAACATCGGGAACCTCCTGTAG    |                          |
| H                | DCV7449F | TACTTGGAACACAACCGATGCCACTAG    | 71                       |
|                  | DCV8902R | AGGATCCAGAATAGTAAGGGAGTTAGGGT  |                          |
| I                | DCV8153F | CATGGTGTTCCATCCAATGACCATAGACAC | 70                       |
|                  | DCV9039R | CCGTGTAAGCAGGGCAGATAGTTACTGAA  |                          |

**Table S2: Primers used to amplify DCV genome.** PCR Cycle: 98°C 30sec, (98°C 30sec, 69-71°C 30sec, 72°C 45sec) x 35 cycles, 72°C 2min

## Supplementary results

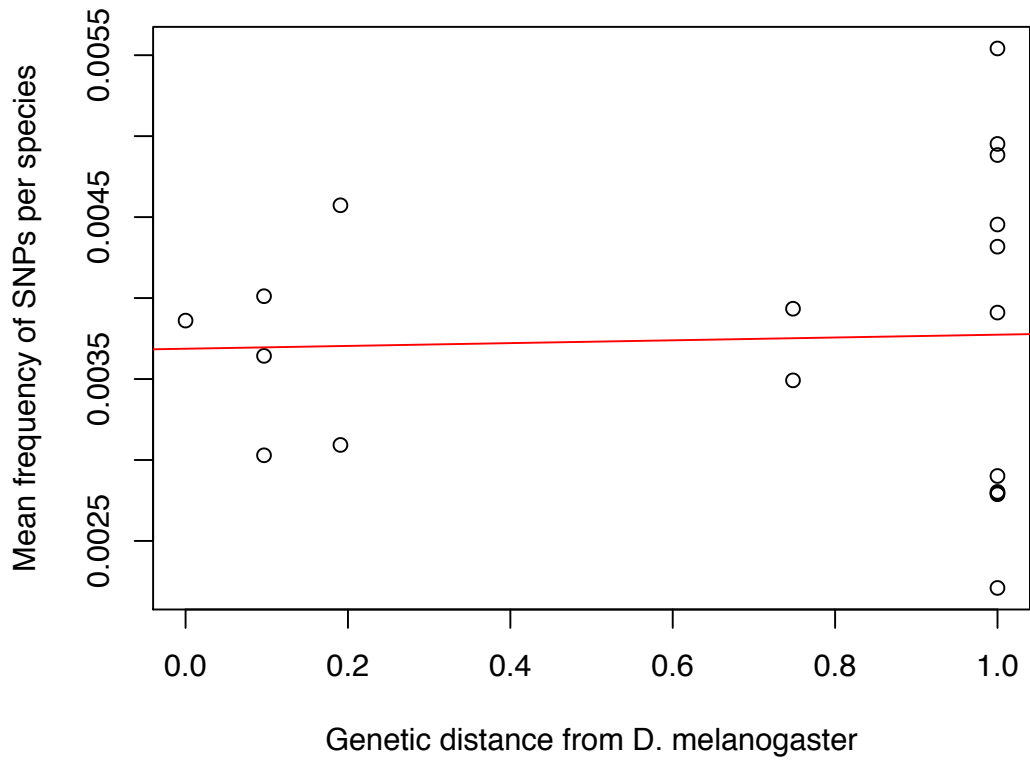

**Figure S1: Correlation between mean SNP frequency and distance from *D. melanogaster*.** We calculated the mean frequency of SNPs across the viral genome for each host species and examined if viruses showed higher rates of molecular evolution with increasing distance from *D. melanogaster*; the host DCV was isolated from and naturally infects. We found no significant change in mean SNP frequency with distance from *D. melanogaster* (phylogenetic mixed model implemented in MCMCglmm package in R as in [1], correlation= 0.0006 (CIs= -0.0176, 0.0188)).

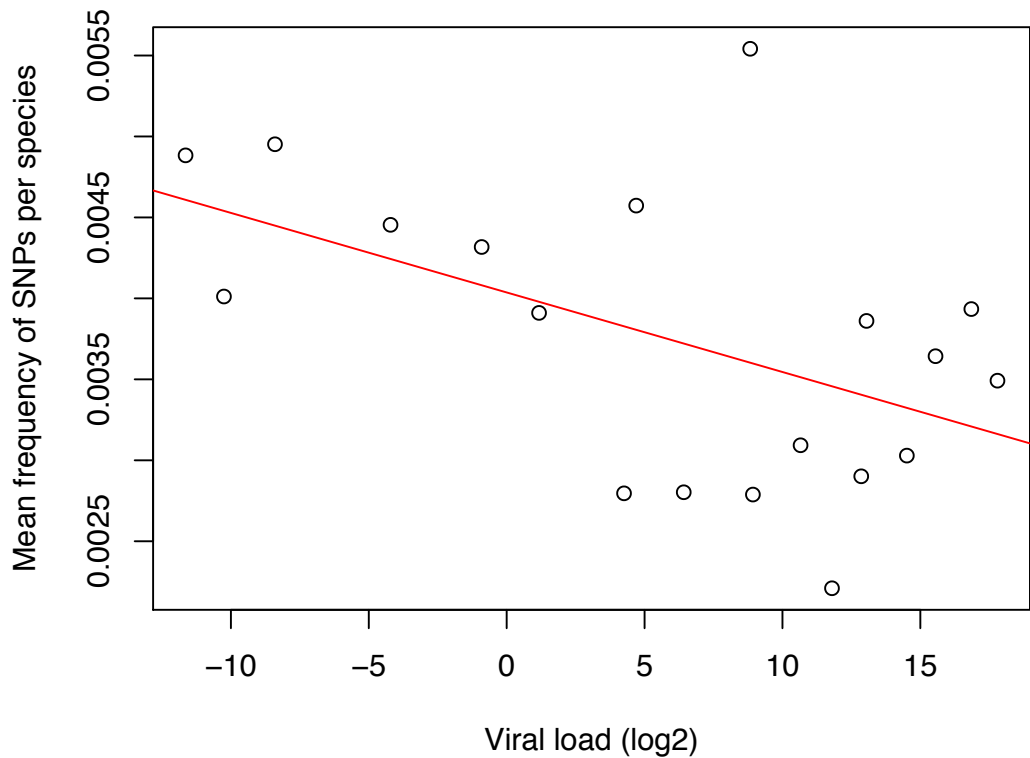

**Figure S2: Correlation between mean SNP frequency and RNA viral load.**

We examined if mean SNP frequency in a species was affected by viral population size. We used RNA viral load calculated by qRT-PCR as in [1] at passage 10 as a proxy for viral population size (viral load did not change significantly between passages 3 and 10). We found no significant relationship between mean SNP frequency and viral load (phylogenetic mixed model implemented in MCMCglmm package in R as in [1], correlation= -0.00006 (CIs= -0.00072, 0.00054).

**Supplementary references**

1. Longdon B, Hadfield JD, Day JP, Smith SC, McGonigle JE, Cogni R, et al. The Causes and Consequences of Changes in Virulence following Pathogen Host Shifts. *PLoS Pathog.* 2015;11(3):e1004728. Epub 2015/03/17. doi: 10.1371/journal.ppat.1004728. PubMed PMID: 25774803.
2. Longdon B, Hadfield JD, Webster CL, Obbard DJ, Jiggins FM. Host phylogeny determines viral persistence and replication in novel hosts. *PLoS Pathogens.* 2011;7(9):e1002260. doi: 10.1371/journal.ppat.1002260.
